# Supplementary material
Source: Frontiers journal article supplement (https://www.frontiersin.org/articles/540112)
Supplement: Data_Sheet_1.PDF [file Data_Sheet_1.PDF]

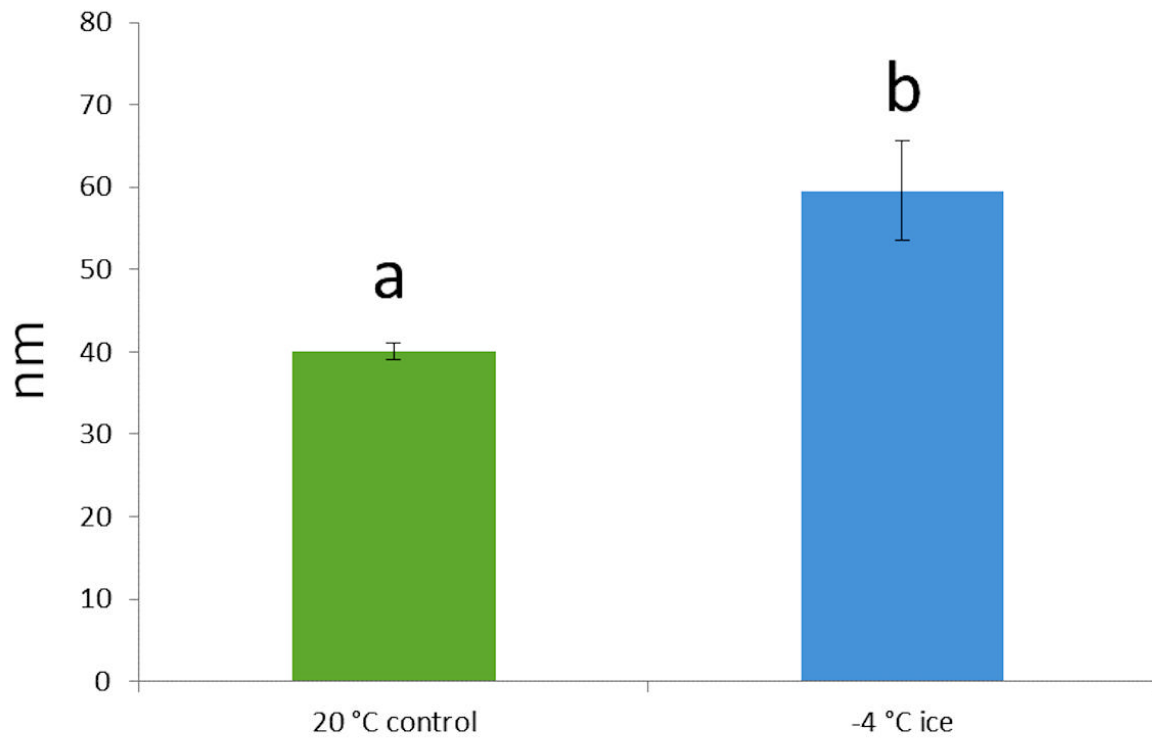

**Supplementary Figure 1.** Bars represent means of three biological replicates (n=3) with displayed standard error (line). The letters “a” and “b” display significant differences between mean values ( $p < 0.05$ ; t-test for two independent samples).
